# Supplementary material for: Selective synthesis of double temperature-sensitive polymer–peptide conjugates
Source: Royal Society of Chemistry journal article supplement (doi:10.1039/b806782a), 2008-01-01

## Supporting Information:

### Peptide modification confirmation via $^1\text{H}$ NMR:

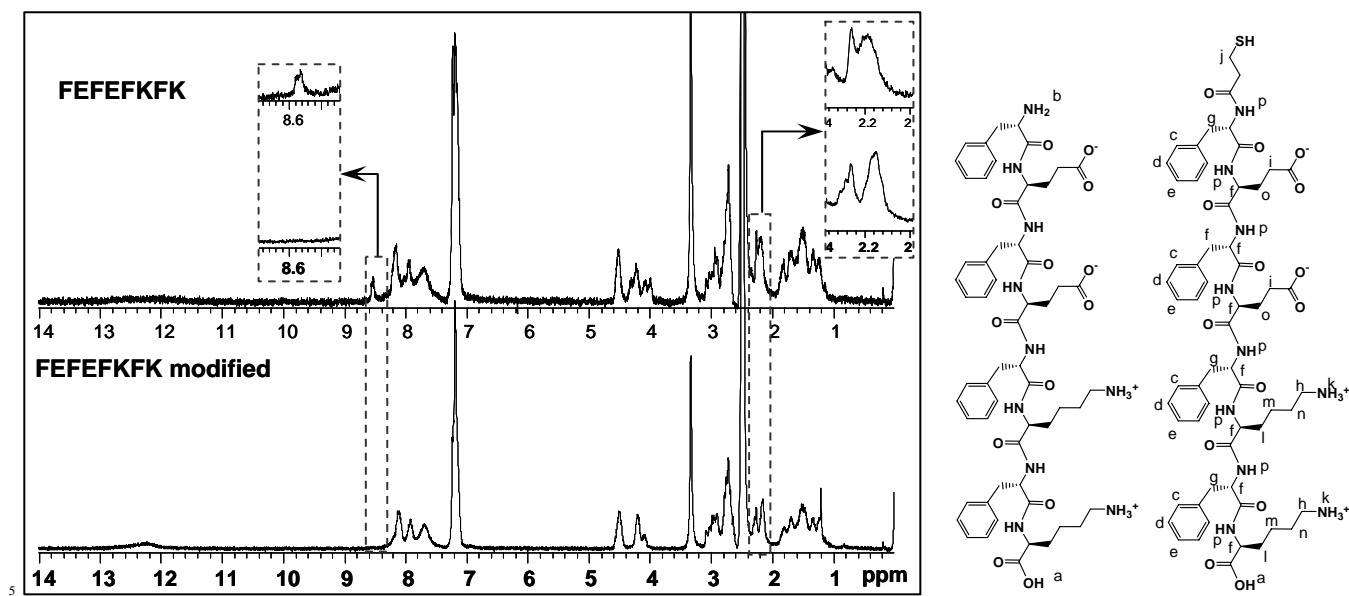

Figure 1:  $^1\text{H}$ -NMR for the unmodified and modified peptides

|    | Group type                                                                  | Peak [ppm] | Assignment |
|----|-----------------------------------------------------------------------------|------------|------------|
| 1  | <u>COOH</u>                                                                 | 12.34      | a          |
| 2  | <u>NH<sub>2</sub></u> (backbone – end – present only in unmodified peptide) | 8.63       | b          |
| 3  | Aromatic rings                                                              | 7.2        | c, d, e    |
| 4  | <u>CH</u> (backbone)                                                        | 4.0-4.6    | f          |
| 5  | <u>CH<sub>2</sub></u> (next to aromatic rings)                              | 3.3        | g          |
| 6  | <u>CH<sub>2</sub></u> (next to NH <sub>2</sub> side chains)                 | 2.85-3.15  | h          |
| 7  | <u>CH<sub>2</sub></u> (next to COOH side chains)                            | 2.85-2.5   | i          |
| 8  | DMSO-d <sub>6</sub>                                                         | 2.5        |            |
| 9  | <u>CH<sub>2</sub></u> (next to SH – present only in modified peptide)       | 2.35       | j          |
| 10 | <u>NH<sub>2</sub></u> (side chains)                                         | 2.0-2.2    | k          |
| 11 | <u>CH</u> (side chains)                                                     | 1.0-2.0    | l, m, n, o |
| 12 | <u>NH</u> (backbone)                                                        | 7.25-8.5   | p          |

10

Table 1:  $^1\text{H}$  NMR peaks assigned to groups

All peaks present in the  $^1\text{H}$  NMR spectra (400 MHz Bruker) for both the pure and modified peptides are assigned in Table 1. The most relevant of these are 8.63 ppm and 2.35 ppm. The peak at 8.63 ppm corresponds to the free  $\text{NH}_2$  end group in the pure, unmodified peptide. As expected, this group is present only in the original peptide and not in the modified peptide. The end group of the modified peptide is SH and the peak at 2.35 ppm in the modified peptide is attributed to its neighbouring  $\text{CH}_2$  group. These results suggest the successful modification of the peptide.

## Peptide functionalisation confirmation by MALDI-Tof:

20

### FEFEFKFK

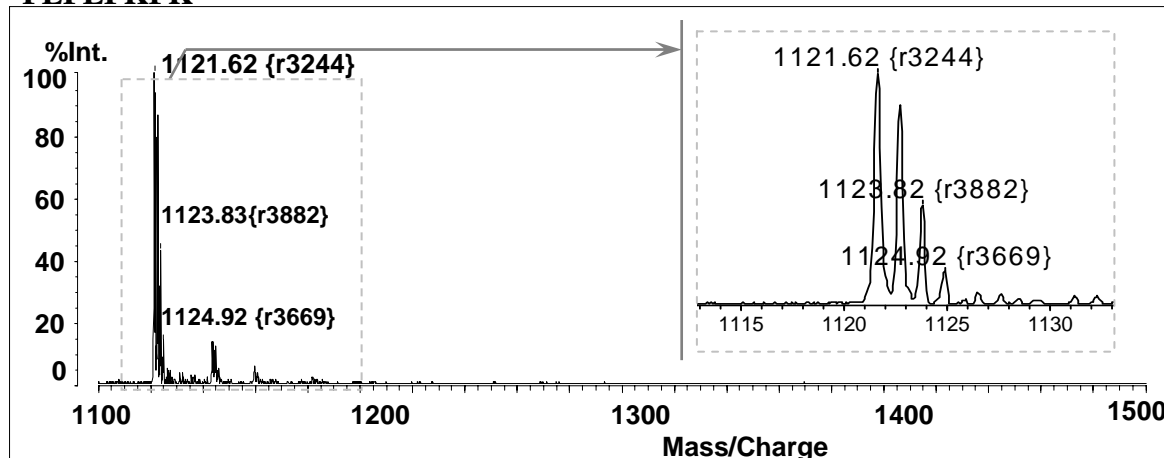25 **Figure 2: MALDI-Tof of the unmodified peptide (FEFEFKFK)**

### FEFEFKFK modified

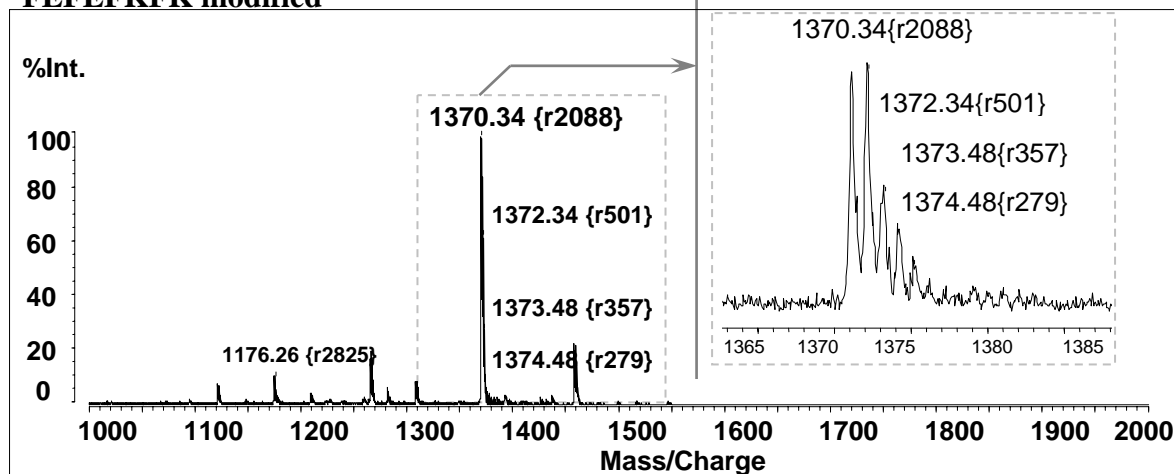30 **Figure 3: MALDI-Tof of the modified peptide (mod FEFEFKFK)**

The results given in figures 2 and 3 show a significant difference in the molecular weight of the two peptides (the modified peptide is  $\sim 249 \text{ g mol}^{-1}$  heavier than the unmodified peptide) confirming functionalisation. These results were obtained from Kratos PC Axima CFR V.2.4.1 operated in reflection mode.

## Peptides purity evaluation by HPLC:

40

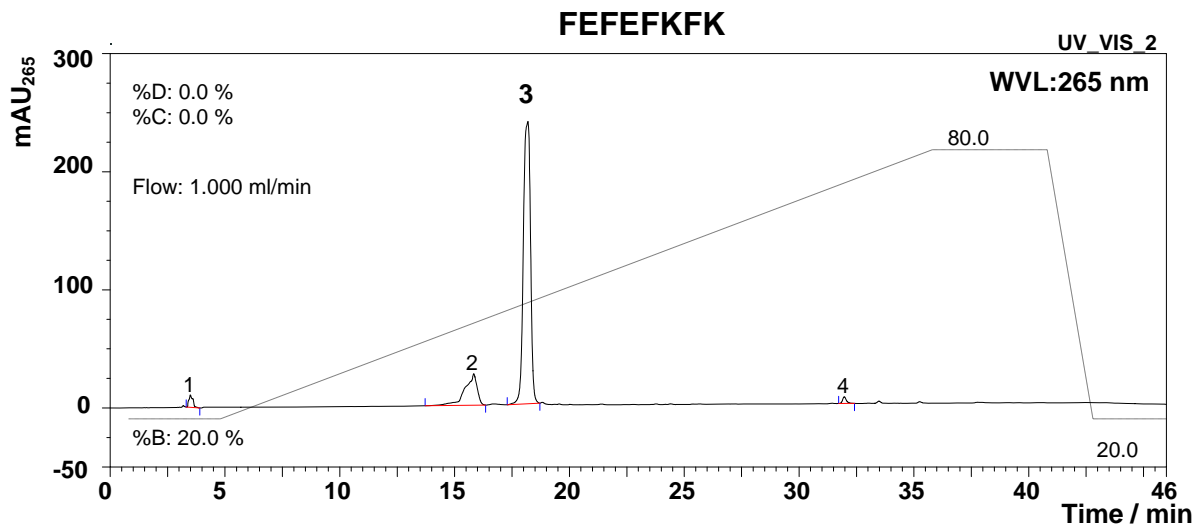

Figure 4: HPLC of the unmodified peptide (FEFEFKFK)

| No.      | Ret.Time   | Area           | Height     | Rel.Area     |
|----------|------------|----------------|------------|--------------|
|          | <i>min</i> | <i>mAU*min</i> | <i>mAU</i> | <i>%</i>     |
| 1        | 3.489      | 2.1274         | 10.554     | 2.02         |
| 2        | 15.83      | 16.1914        | 26.66      | 15.35        |
| <b>3</b> | 18.191     | 86.0258        | 239.09     | <b>81.57</b> |
| 4        | 31.972     | 1.1242         | 5.717      | 1.07         |
| Total    |            | 105.469        | 282.02     | 100          |

45

Table 2: HPLC results for the original peptide and the purity percentage

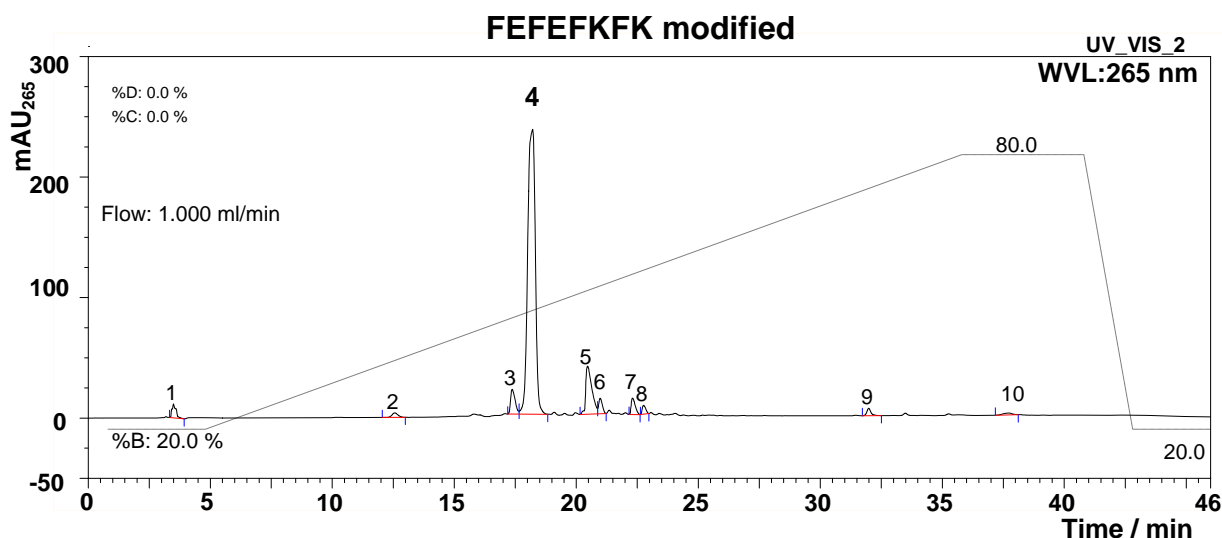

50 **Figure 5: HPLC of the modified peptide (mod FEFEFKFK)**

| No.      | Ret.Time   | Area           | Height     | Rel.Area     |
|----------|------------|----------------|------------|--------------|
|          | <i>min</i> | <i>mAU*min</i> | <i>mAU</i> | <i>%</i>     |
| 1        | 3.493      | 2.1686         | 11.343     | 1.93         |
| 2        | 12.562     | 1.0444         | 3.719      | 0.93         |
| 3        | 17.372     | 4.4374         | 20.486     | 3.94         |
| <b>4</b> | 18.207     | 85.2175        | 236.288    | <b>75.74</b> |
| 5        | 20.464     | 11.7165        | 39.817     | 10.41        |
| 6        | 20.98      | 2.252          | 12.812     | 2            |
| 7        | 22.307     | 2.6062         | 13.666     | 2.32         |
| 8        | 22.762     | 1.2377         | 7.28       | 1.1          |
| 9        | 31.989     | 1.1651         | 6.086      | 1.04         |
| 10       | 37.734     | 0.6698         | 1.575      | 0.6          |
| Total:   |            | 112.515        | 353.072    | 100          |

55 **Table 3: HPLC results for the modified peptide and the purity percentage**

The HPLC results show a high purity in both the unmodified and modified peptides; 81 % and 76 % respectively, confirming the MALDI results. These results were obtained using reverse phase HPLC where buffer A was HPLC grade water with 0.1% trifluoroacetic acid (TFA) and buffer B was HPLC grade acetonitrile with 0.1% TFA. A gradient of 20-80% of B was used with a sample injection of 100  $\mu$ L. The following set up was employed: Dionex P680 HPLC pump, with a Dionex ASI 100 automated sample injector, a Dionex UVD170U detector. The column is a Macherey-Nagel EC250/4.6 Nucleosil 100-5 C18 column.

**65 Confirmation of conjugation by solid state NMR:**
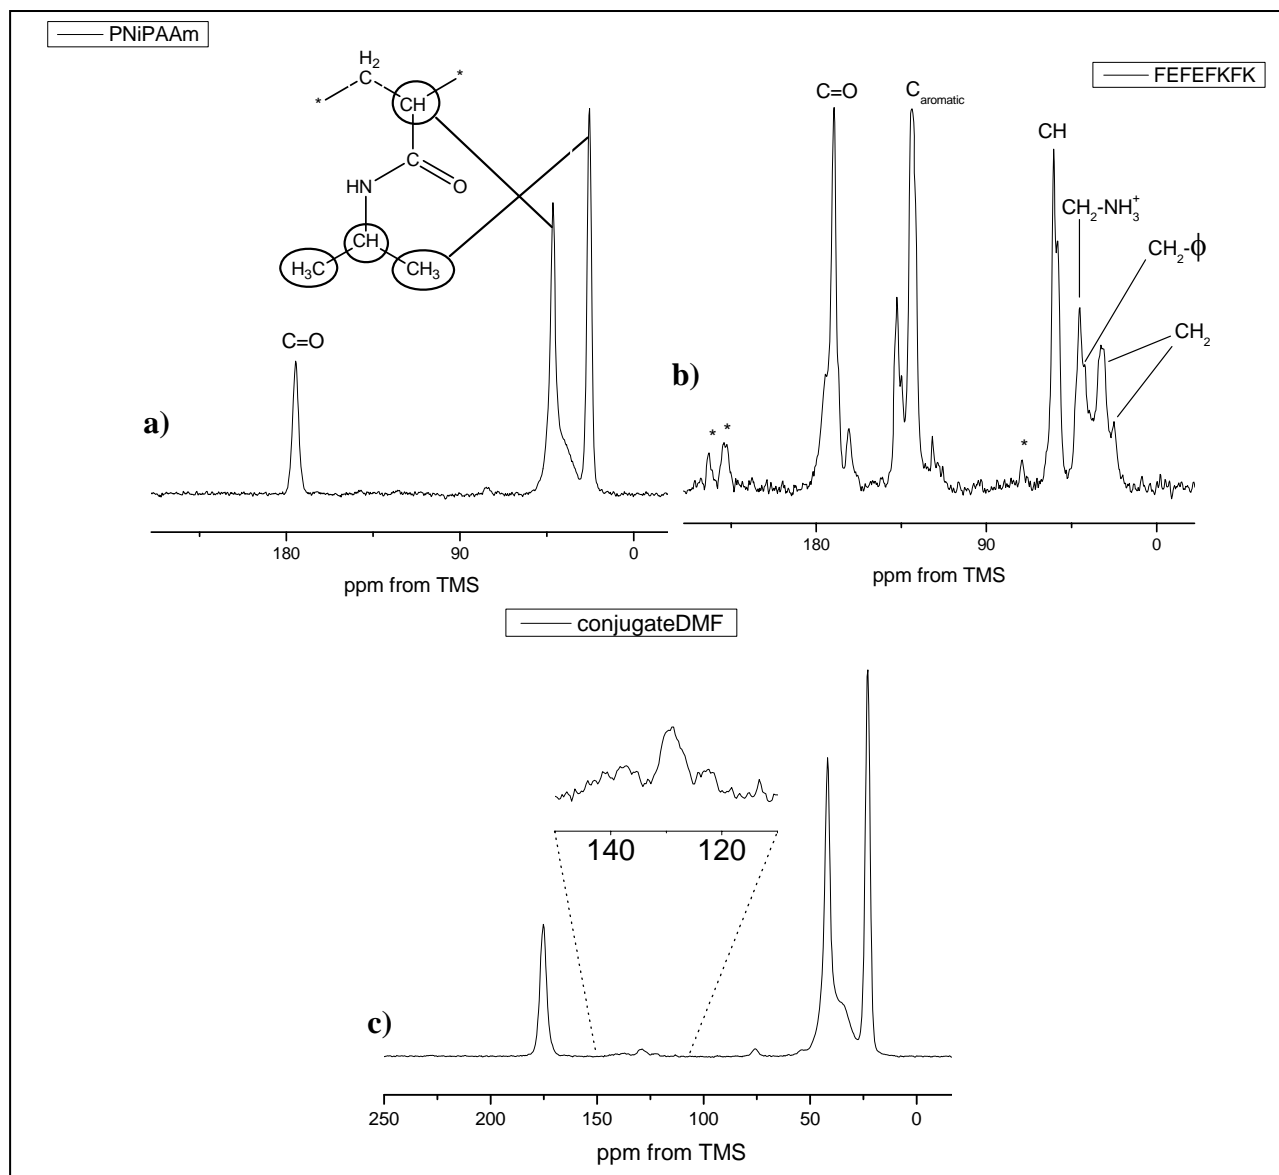
**70 Figure 6: Solid state NMR: a) pure polymer, b) pure peptide and c) the conjugate.**

After synthesis and purification the conjugate was analysed by solid state NMR using the non-conjugated polymer and the peptide as standards. Spectra are shown in Figure 6 where peaks have been identified. For the conjugate (Figure 6c), supplementary peaks were found in the range of 110-150 ppm, that corresponds to the phenyl rings present in the peptide. These results confirmed the presence of the peptide in the conjugate structure. NMR spectra were recorded at 9.4 T using a Bruker DSX-400 spectrometer, in <sup>1</sup>H to <sup>13</sup>C cross-polarisation magic angle spinning mode.

## Quantification of peptide/NIPAAm ratio in conjugate by $^1\text{H}$ NMR and UV:

80

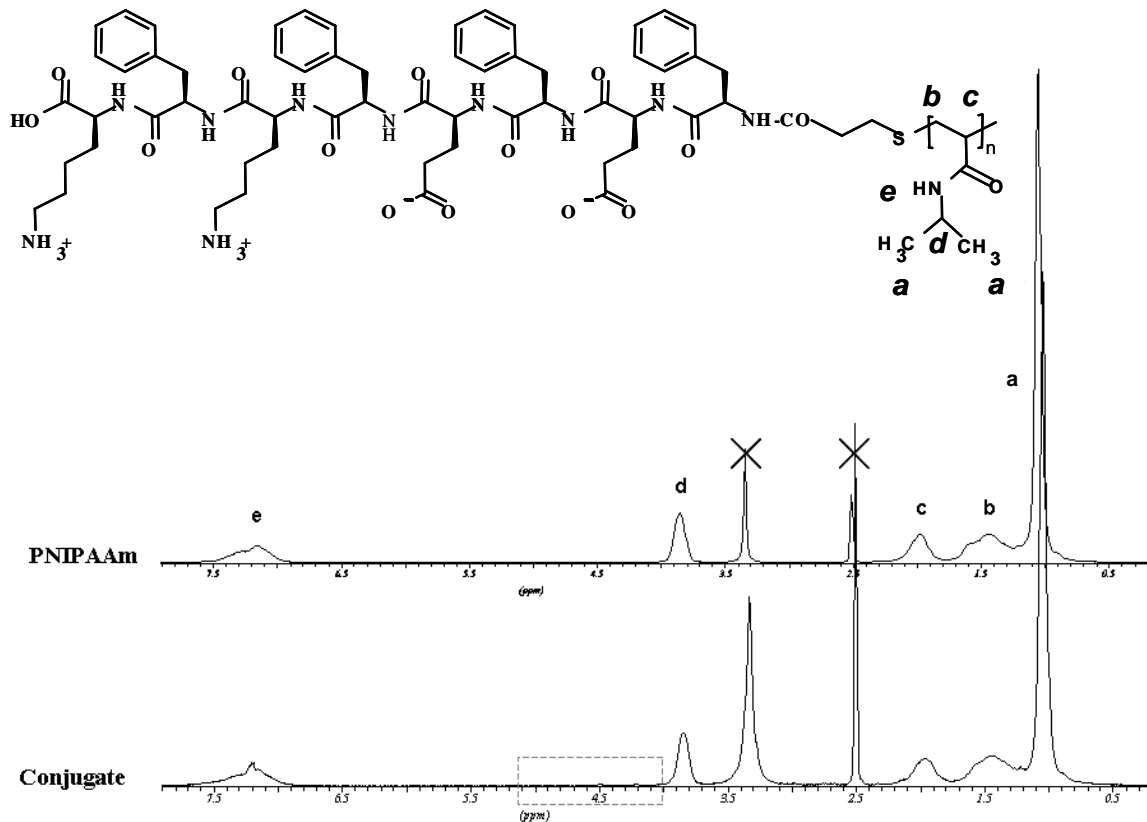

Figure 7:  $^1\text{H}$  NMR spectra for pure polymer and for the conjugate

85

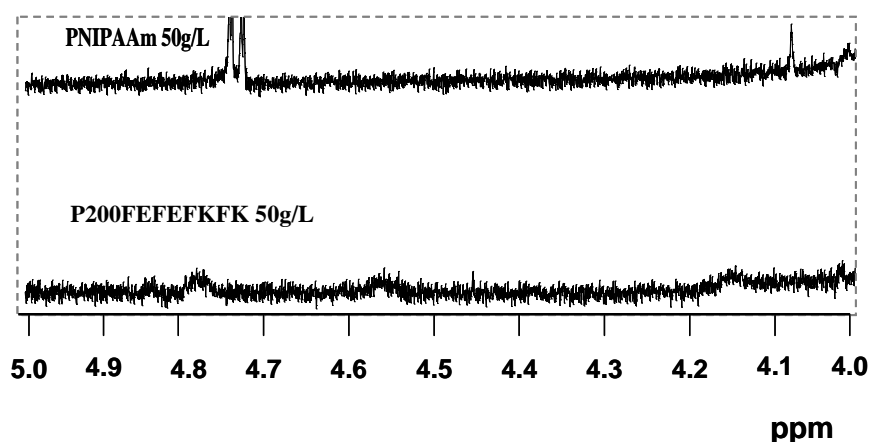

Figure 8: Magnified  $^1\text{H}$  NMR spectra for pure polymer and for the conjugate

90

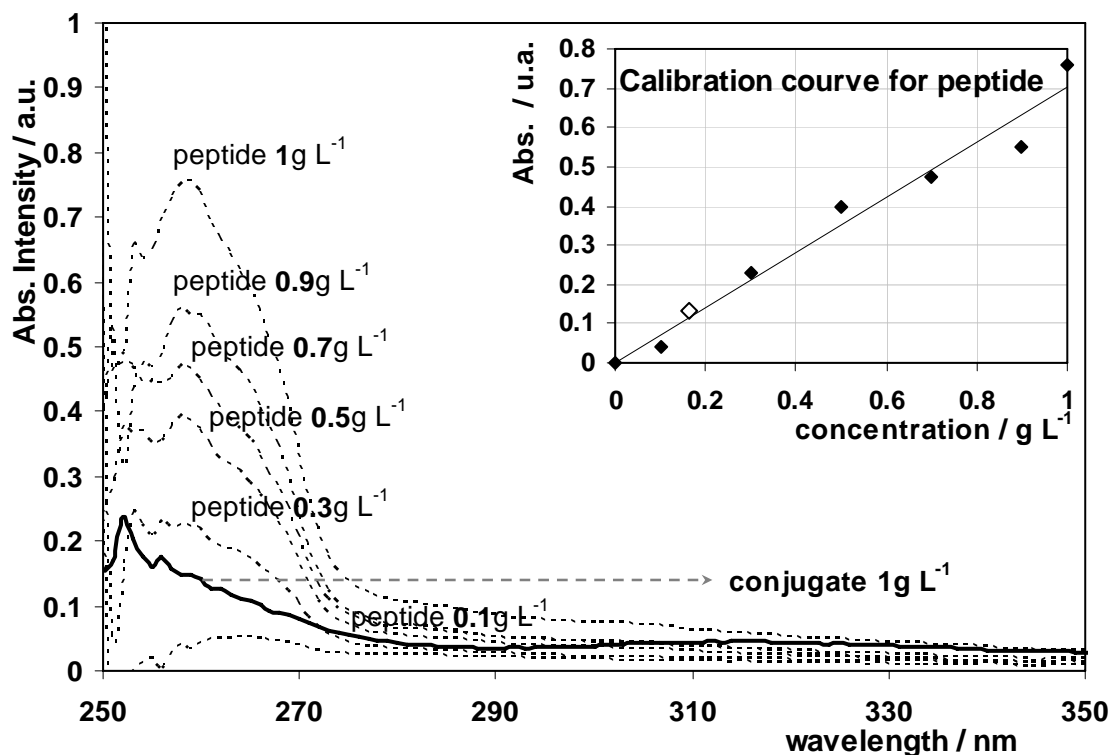

Figure 9: UV spectra for unmodified peptide solutions with varying concentrations (dotted lines) and for a conjugate solution at 1 g L<sup>-1</sup>. Inset: calibration curve (closed diamonds) obtained for the unmodified peptide and conjugate absorbance (open diamond).

In order to quantify the amount of peptide attached at the end of the polymeric chain, two methods were used: proton NMR and UV. Peak assignment in the <sup>1</sup>H NMR spectra is shown in Figure 7 and the region of interest for quantification is magnified in Figure 8. The peaks at 4.1, 4.55 and 4.8 ppm correspond to the CH from the backbone of the peptide and are very distinctive. These peaks were used for quantification taking the CH<sub>3</sub> groups of polymeric chain as a reference point. The <sup>1</sup>H NMR spectra were recorded on a Bruker, 400MHz spectrometer, using 16 scans for time averaging. The absorbance at 258 nm was used to confirm the quantification of amount of peptide by UV. A calibration curve was build using the modified peptide and was then subsequently used to quantify the amount of peptide present in the conjugate. Spectra were recorded on a Shimadzu 2501 double beam spectrometer.

## Graphical Content Entry

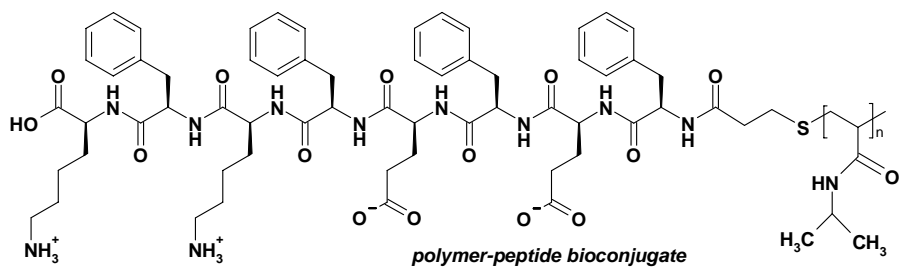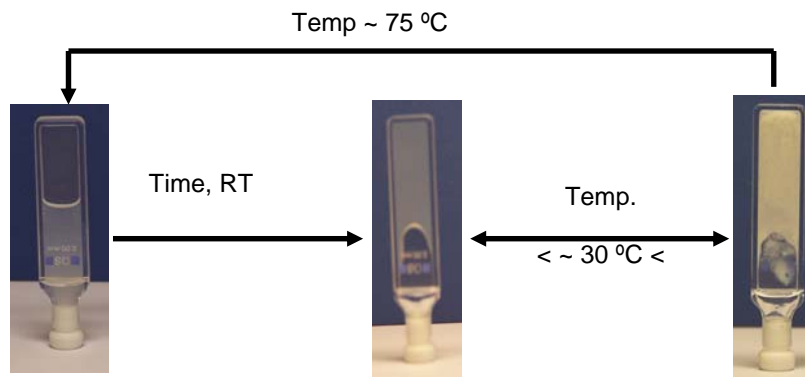

Supplement: b806782a.pdf [file b806782a.pdf]
